# Supplementary material for: Non coding RNA analysis in fibrolamellar hepatocellular carcinoma
Source: PubMed Central journal article supplement (PMC5828204; doi:10.18632/oncotarget.23325), 2017-12-15
Supplement: oncotarget-09-10211-s001.pdf [file oncotarget-09-10211-s001.pdf]

## Non coding RNA analysis in fibrolamellar hepatocellular carcinoma

### SUPPLEMENTARY MATERIALS

**Supplementary Table 1: Differential expression of mature miRNA with absolute Log<sub>2</sub> fold change ≥1 and FDR<0.01.**  
See Supplementary\_Table\_1

**Supplementary Table 2: Differential expression of lncRNA with absolute Log<sub>2</sub> fold change ≥1 and FDR<0.01.**  
See Supplementary\_Table\_2

#### Supplementary Table 3: Chimera primer sequences

| Primer          | Sequence 5'→3'       |
|-----------------|----------------------|
| Chimera Forward | TTCAAGGAGATCGCTGAGGC |
| Chimera Reverse | CTGTGTTCTGAGCGGGACTT |

Expected amplicon 148 bp
